# Supplementary material for: Severe COVID-19 Illness: Risk Factors and Its Burden on Critical Care Resources
Source: PubMed Central journal article supplement (PMC7711126; doi:10.3389/fmed.2020.583060), 2020-11-19

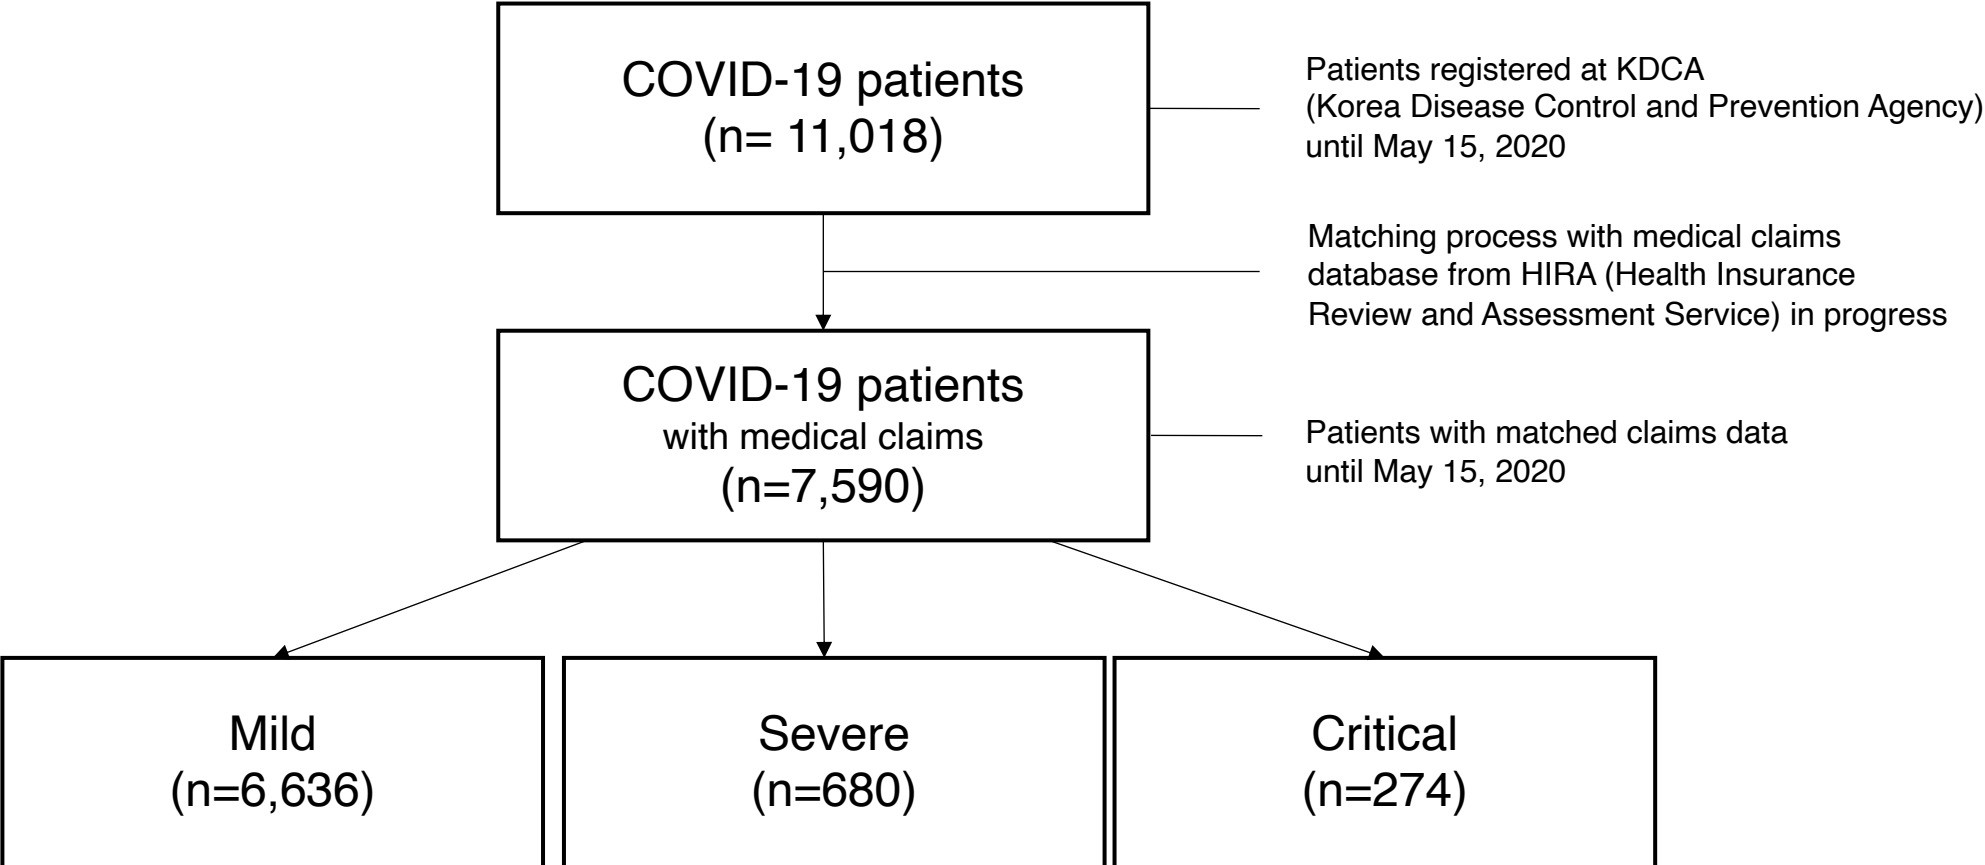

Supplement: Image_1.pdf [file Image_1.pdf]
